# Supplementary material
Source: publisher site journal article supplement (https://natureconservation.pensoft.net/article/35049/download/suppl/31/)
Supplement: Supplementary file 1

## Seeking consensus in German forest conservation: An analysis of contemporary concepts

Laura Demant, Peter Meyer, Holger Sennhenn-Reulen, Helge Walentowski, Erwin Bergmeier

Corresponding author: Laura Demant.

Email: laura.demant@nw-fva.de

Supplementary material

This file includes: Tables S1-S3

**Table S1:** Framework for conservation objectives and its application.

| Level | Name | Position | Specification | Abbreviation | Code | Continue with position |
| --- | --- | --- | --- | --- | --- | --- |
| 1 | General field of conservation |  | Socio-political | S | S | S* |
| Nature conservation *sensu stricto* | N | N | N* |
| 2 | Socio-political | S* | Tourism, recreation | T | ST | Keyword or cross-connection (N**F(S*)) |
| Financial funding to protect biodiversity | F | SF |
| Legal issues or law | L | SL |
| Consciousness for and knowledge of biodiversity-values | C | SC |
| Role model function | M | SM |
| Biological education | E | SE |
| Sustainability | S | SS |
| Social obligation for habitat protection | O | SO |
| Nature conservation target / field of natural resources | N* | Biotic target (protection of the living environment) | B | NB | NB* |
| Abiotic target (protection of the lifeless environment) | A | NA | NA* |
| 3 | Abiotic targets | NA* | Protection of soil | S | NAS | keyword or cross-connection (NB*F(NA*)) |
| Protection of climate | C | NAC |
| Protection of water | W | NAW |
| Biotic targets | NB* | Protection of genetic diversity | G | NBG | NB** |
| Protection of species | S | NBS |
| Protection of ecosystems | E | NBE |
| Protection of landscapes | L | NBL |
| 4 | Categories of natural resources | NB** | Processes | P | NB*P | NB*** |
| Structures, elements | S | NB*S |
| Functions = cross-connection to other levels | F | NB*F(***) |
| 5 | Qualities and properties of natural resources | NB*** | Diversity | D | NB**D | NB**** |
| Characteristic typical form | T | NB**T |
| Completeness, integrity | C | NB**C |
| 6 | Management dependency | NB**** | Self-sustaining | S | NB***S | keyword |
| Management dependent, culture-bound | M | NB***M |

**Table S2**: List of all target keywords, their German equivalent and their assigned codes according to the framework of conservation objectives.

| **Keyword** | **German equivalent** | **Cross-connection/specification** | **Code** |
| --- | --- | --- | --- |
| Beech forests | Buchenwälder |  | NBESTS |
| Beech forests with climate protection function | Buchenwälder | Klimaschutzfunktion | NBEF(NAC) |
| Biotope network | Biotopverbund |  | NBL*** |
| Biotope networks for genetic exchange | Biotopverbund | Genetischer Austausch | NBGPD* |
| Biotope networks with climate protection function | Biotopverbund | Klimaschutzfunktion | NBLF(NAC) |
| Biotope protection | Lebensraumschutz |  | NBLS** |
| Biotope types | Biotoptypen |  | NBEST* |
| Bog forests | Moorwälder |  | NBESTS |
| Bogs | Moore |  |  |
| Bogs with climate protection function | Moore | Klimaschutzfunktion | NBEF(NAC) |
| Canyon forests | Hang- und Schluchtwälder |  | NBESTS |
| Certification | Zertifizierung |  | NBE*** |
| Close-to-nature forestry | Forstwirtschaft | Naturnah | N**F(S) |
| Close-to-nature forestry for climate protection | Naturnahe Forstwirtschaft | Klimaschutzfunktion | NBEF(NAC) |
| Coastal waters | Binnen- und Küstengewässer |  | NBESTS |
| Conservation of genetic populations | Genetischer Populationserhalt |  | NBGP** |
| Cultural heritage | Kulturerbe |  | NB***M |
| Deadwood-dependent species | Totholz | Artenschutz | NBSSDS |
| Deadwood in forest ecosystems | Totholz | Ökosystemschutz | NBESDS |
| Deadwood with climate protection function | Totholz | Klimaschutzfunktion | NBEF(NAC) |
| Ecosystem services | Ökosystemdienstleistungen |  | NBE*** |
| Ecosystems stepping stones | Wildtierkorridore und -trittsteine in Ökosystemen |  | NBEPDS |
| Endemic species | Endemische Arten |  | NBSST* |
| Establishment of new forest for climate protection | Waldneubegründung | Klimaschutzfunktion | NBEF(NAC) |
| Financial funding of forest conservation | Waldnaturschutz | Finanzielle Förderung | NB*S(SF) |
| Fir forests | Tannenwälder |  | NBESTS |
| Floodplain forests | Auwälder |  | NBESTS |
| Floodplains | Auen |  | NBES*S |
| Floodplains with climate protection function | Auen | Klimaschutzfunktion | NBEF(NAC) |
| Floodplains with water protection function | Auen | Wasserschutzfunktion | NBEF(NAW) |
| Forest developing stages | Waldentwicklungsphasen |  | NBEPDS |
| Forest dynamics | Walddynamik |  | NBEPDS |
| Forest edges | Waldränder |  | NBLSDM |
| Forest meadows | Waldwiesen |  | NBESDS |
| Forest protection | Waldschutz |  | NBE*** |
| Forest structures | Waldstrukturen |  | NBESDS |
| Forests for recreation | Wälder | Erholungsfunktion | NBEF(ST) |
| Forests with climate protection function | Wälder | Klimaschutzfunktion | NBEF(NAC) |
| Forests with flood protection function | Wälder | Hochwasserschutzfunktion | NBEF(NAW) |
| Forests with immission protection function | Wälder | Immissionsschutzfunktion | NBEF(NAC) |
| Forests with soil protection function | Wälder | Bodenschutzfunktion | NBEF(NAS) |
| Forests with water protection function | Wälder | Wasserschutzfunktion | NBEF(NAW) |
| Genetics protection | Heimisches Pflanz- und Saatgut |  | NBGSDS |
| Habitat continuity | Habitatkontinuität |  | NBEPTS |
| Habitat protection | Schutz der Artenlebensräume |  | NBSS** |
| Habitat trees | Habitatbäume |  | NBES*S |
| Heath forests | Heidewälder |  | NBESTS |
| Hunting | Wildbesatz/Jagd |  | NBESCM |
| Inland dunes | Binnendünen |  | NBESTS |
| Landscape mosaic | Landschaftsmosaik |  | NBLSTM |
| Large protected areas as surrogates for sustainability | Großschutzgebiete | Modellregionen für Nachhaltigkeit | N**F(SS) |
| Light dependent forest species | Lichtwaldarten |  | NBS*DM |
| Light dependent tree species | Lichtbaumarten |  | NBS*DM |
| Location appropriate forests | Standortgerechte Wälder und Baumarten |  | NBESTS |
| Location appropriate forests for climate protection | Standortgerechte Wälder und Baumarten | Klimaschutzfunktion | NBEF(NAC) |
| Micro habitats | Mikrohabitate |  | NBES** |
| Mixed forests | Mischwälder |  | NBESDS |
| Mixed forests with climate protection function | Mischwälder | Klimaschutzfunktion | NBEF(NAC) |
| Mountain forests | Bergwälder |  | NBESTS |
| Multifunctional forestry | Forstwirtschaft | Multifunktional | N**F(S) |
| Multilayered forests | Mehrschichtige Wälder |  | NBESDS |
| Native tree species | Standortheimische Baumarten |  | NBESTS |
| Native tree species for climate protection | Standortheimische Baumarten | Klimaschutzfunktion | NBEF(NAC) |
| Natura 2000 habitats | Lebensraumtypen der Flora-Fauna-Habitat Richtlinie |  | NBES** |
| Natura 2000 species | Arten der Flora-Fauna-Habitat und Vogelschutz Richtlinie |  | NBSS** |
| Natural deciduous forests | Natürliche Laubwälder |  | NBESTS |
| Natural forest communities | Natürliche Waldgesellschaften |  | NBESTS |
| Natural regeneration | Waldnaturverjüngung |  | NBEPTS |
| Natural forest reserves | Naturwaldreservate |  | NBESTS |
| Natural forests | Naturwälder |  | NBESTS |
| Natural heritage | Naturerbe |  | NB***S |
| Naturally developing forests | Wälder mit natürlicher Entwicklung |  | NBEPTS |
| Naturally developing forests role model function | Natürliche Waldentwicklung auf 10 % der Waldfläche der öffentlichen Hand | Vorbildfunktion | NBEF(SM) |
| Nature conforming forestry | Forstwirtschaft | Naturgemäß | N**F(S) |
| Near-natural forests | Naturnahe Wälder |  | NBESTS |
| Oak forests | Eichenwälder |  | NBESDM |
| Old-growth forest | Alte Wälder |  | NBEPTS |
| Old-growth forests for climate protection | Alte Wälder | Klimaschutzfunktion | NBEF(NAC) |
| Open landscapes | Offene Landschaftselemente |  | NBLSDM |
| Permanent forest | Dauerwald |  | NBEPTS |
| Pine forests | Kiefernwälder |  | NBESTS |
| Plant communities | Pflanzengesellschaften |  | NBSS** |
| Process conservation | Prozessschutz |  | NBEPTS |
| Protected areas | Schutzgebiete |  | N***** |
| Rare forest communities | Seltene Waldgesellschaften |  | NBESD* |
| Rare species | Seltene Arten |  | NBSSD* |
| Rare tree species | Seltene Baumarten |  | NBSSDM |
| Regional tree communities | Regionaltypische Waldgesellschaften |  | NBESTS |
| Relict species | Urwaldreliktarten |  | NBSSTS |
| Site specific forests | Standorttypische Wälder und Baumarten |  | NBESCS |
| Site Specific tree species | Standortgemäße Baumarten |  | NBESTS |
| Social obligation for beech forests protection | Buchenwälder | Erhaltungsverantwortung | NBEF(SR) |
| Social obligation for habitat protection | Lebensräume | Erhaltungsverantwortung | NB*F(SR) |
| Species stepping stones | Wildtierkorridore und -trittsteine |  | NBSPDS |
| Spruce forests | Fichtenwälder |  | NBES*S |
| Stepping stones for genetic exchange | Wildtierkorridore und -trittsteine für den genetischen Austausch |  | NBGPDS |
| Riverine systems | Fließgewässer |  | NBES*S |
| Sustainable forestry | Forstwirtschaft | Nachhaltig | NB**F(SS) |
| Swamp Forests | Sumpf- und Bruchwälder |  | NBESTS |
| Traditional forest management | Traditionelle Waldbewirtschaftung (Hute-, Mittel- und/oder Niederwälder) |  | NBESDM |
| Tree species diversity | Baumartenvielfalt |  | NBESDS |
| Unfragmented forest area | Unzerschnittene Waldfläche |  | NBLSCS |
| Unfragmented landscape | Unzerschnittene Landschaft |  | NBLSCS |
| Water bodies | Stillgewässer |  | NBES*S |
| Wetlands | Feuchtgebiete |  | NBES*S |
| Wilderness | Wildnis |  | NBE*TS |
| Wildlife species | Wildtierarten |  | NBSS*S |

**Table S3:** List of all concepts analyzed in this study with their names, references, type of concept, assigned stakeholder group, jurisdictional scale level allocation and their year of publication.

| **Name** | **Reference** | **CConcept type** | **Stakeholder group** | **Scale level** | **Year** |
| --- | --- | --- | --- | --- | --- |
| Nature Conservation - BUND Position 59 | BUND -Association for the Environment and Nature Conservation Germany e.V. | Biodiversity concept | Associations and NGO´s | National | 2012 |
| Biodiversity Conservation in Germany 2014 - Comparative Country Analysis for the Protection of Biodiversity | BUND -Association for the Environment and Nature Conservation Germany e.V. and NABU - Nature Conservation Association Germany e.V. | Biodiversity concept | Associations and NGO´s | Regional | 2013 |
| Strategic Plan for Biodiversity 2011–2020 and the Aichi Targets | Secretariat of the Convention on Biological Diversity | Biodiversity concept | Institutions/ administrations | International | 2011 |
| EU Biodiversity Strategy to 2020 | European Commission | Biodiversity concept | Institutions/ administrations | International | 2011 |
| 2030 UN-Agenda for Sustainable Development | United Nations | Biodiversity concept | Institutions/ administrations | International | 2015 |
| Federal Act for the Protection of Nature - BNatSchG, as amended on 29th of July 2009 | Federal Ministry of Justice and Consumer Protection | Biodiversity concept | Institutions/ administrations | National | 2009 |
| German National Strategy on Biodiversity | German Federal Ministry for the Environment, Nature Conservation, Building and Nuclear Safety | Biodiversity concept | Institutions/ administrations | National | 2007 |
| Thuringian Strategy for the conservation of biological diversity | Ministry of Agriculture, Forestry, Environment and Nature Conservation Thuringia | Biodiversity concept | Institutions/ administrations | Regional | 2012 |
| Berlin Strategy on Biodiversity | Senate Department for Urban Development Berlin | Biodiversity concept | Institutions/ administrations | Regional | 2012 |
| Program of measures Biological Diversity Brandenburg | Ministry of Rural Development, Environment and Agriculture of the country Brandenburg | Biodiversity concept | Institutions/ administrations | Regional | 2014 |
| Conservation Strategy of the State of Baden-Wuerttemberg | Ministry of Rural and Consumer Protection Baden-Wuerttemberg | Biodiversity concept | Institutions/ administrations | Regional | 2014 |
| Bavarian biodiversity strategy and Bavarian biodiversity program 2030 | Bavarian Ministry of the Environment and Consumer Protection | Biodiversity concept | Institutions/ administrations | Regional | 2014 |
| Hessian biodiversity strategy | Hessian ministry for environment, climate protection, agriculture and consumer protection | Biodiversity concept | Institutions/ administrations | Regional | 2015 |
| Green Diversity - Quality of the City of Hamburg, Strategy for the Development of Biodiversity | Free and Hanseatic City of Hamburg | Biodiversity concept | Institutions/ administrations | Regional | 2012 |
| Conservation and development of biological diversity in Mecklenburg-Vorpommern | Ministry of Agriculture, Environment and Consumer Protection Mecklenburg-Vorpommern | Biodiversity concept | Institutions/ administrations | Regional | 2012 |
| Biodiversity Strategy of the State of North Rhine-Westphalia | Ministry for Climate Protection, Environment, Agriculture, Nature and Consumer Protection of the State of North Rhine-Westphalia | Biodiversity concept | Institutions/ administrations | Regional | 2015 |
| Biodiversity strategy for Rhineland-Palatinate | Ministry of the Environment, Agriculture, Food, Viticulture and Forestry Rhineland-Palatinate | Biodiversity concept | Institutions/ administrations | Regional | 2015 |
| Conservation 2020 - 20 points for the natural diversity Schleswig-Holstein | Ministry of Agriculture, Environment and Rural Areas of Schleswig-Holstein | Biodiversity concept | Institutions/ administrations | Regional | 2009 |
| Saarland biodiversity strategy | Ministry of Environment and Consumer Protection Saarland | Biodiversity concept | Institutions/ administrations | Regional | 2015 |
| Program on biological diversity in the Free State of Saxony | Saxon State Ministry of Environment and Agriculture | Biodiversity concept | Institutions/ administrations | Regional | 2009 |
| Biodiversity Strategy of the State of Saxony-Anhalt | Ministry of Agriculture and Environment of Saxony-Anhalt | Biodiversity concept | Institutions/ administrations | Regional | 2010 |
| State of Europe´s Forests | Ministerial Conference on the Protection of Forests in Europe | Forest conservation concept | Associations and NGO´s | International | 2015 |
| Living forests - BUND Position 57 | BUND -Association for the Environment and Nature Conservation Germany e.V. | Forest conservation concept | Associations and NGO´s | National | 2011 |
| Five-point plan for the forest of the future | BUND -Association for the Environment and Nature Conservation Germany e.V. and NABU - Nature Conservation Association Germany e.V. | Forest conservation concept | Associations and NGO´s | National | 2011 |
| Forestry 2020 Perspectives and requirements from the point of view of nature conservation | NABU - Nature Conservation Association Germany e.V. | Forest conservation concept | Associations and NGO´s | National | 2008 |
| Germany's international responsibility: protecting beech forests in a network | Greenpeace e.V. | Forest conservation concept | Associations and NGO´s | National | 2011 |
| Protects the old beech forests | Greenpeace e.V. | Forest conservation concept | Associations and NGO´s | National | 2012 |
| More nature conservation in the forest | NABU - Nature Conservation Association Germany e.V. | Forest conservation concept | Associations and NGO´s | National | 2010 |
| NABU position: natural forest development until 2020 | NABU - Nature Conservation Association Germany e.V. | Forest conservation concept | Associations and NGO´s | National | 2013 |
| Natura 2000 in private forests | NABU - Nature Conservation Association Germany e.V. | Forest conservation concept | Associations and NGO´s | National | 2014 |
| Requirements for the citizen forest in the 21st century | BUND - Nature Conservation in Bavaria e.V. and Greenpeace Bavaria | Forest conservation concept | Associations and NGO´s | Regional | 2013 |
| Agenda for Lower Saxony's forests from the point of view of BUND, Greenpeace and NABU | BUND, Greenpeace and NABU Lower Saxony | Forest conservation concept | Associations and NGO´s | Regional | 2013 |
| More natural forests for Bavaria | Greenpeace e.V. and BUND -Association for the Environment and Nature Conservation Germany e.V. | Forest conservation concept | Associations and NGO´s | Regional | 2016 |
| More nature conservation in the forest - NABU calls for new forest strategy for North Rhine-Westphalia | NABU - North Rhine-Westphalia | Forest conservation concept | Associations and NGO´s | Regional | 2013 |
| Forest in North Rhine-Westphalia, our valuable natural heritage | Ministry for Climate Protection, Environment, Agriculture, Nature and Consumer Protection of the State of North Rhine-Westphalia | Forest conservation concept | Institutions/ administrations | Regional | 2013 |
| Species and habitat protection in Natura 2000 state forest of Schleswig-Holstein | State Office for Agriculture, Environment and Rural Areas Schleswig-Holstein | Forest conservation concept | Institutions/ administrations | Regional | 2009 |
| Principles of Action for Species and Habitat Protection in Natura 2000 Forest Areas | Schleswig-Holsteinische Landesforsten | Forest conservation concept | State forestry departments | Regional | 2008 |
| Biodiversity in the forests of North Rhine-Westphalia | Landesbetrieb Wald und Holz NRW | Forest conservation concept | State forestry departments | Regional | 2008 |
| Conservation concept of the Bavarian State Forests | Bayerische Staatsforsten | Forest conservation concept | State forestry departments | Regional | 2009 |
| Promoting Biodiversity: Genetic Diversity in the Forest - A Guide to Forest Management in North Rhine-Westphalia | Landesbetrieb Wald und Holz NRW | Forest conservation concept | State forestry departments | Regional | 2010 |
| Biodiversity in the forests | Landesforsten Rheinland-Pfalz | Forest conservation concept | State forestry departments | Regional | 2010 |
| Operating instruction: Forest nature conservation in the Landesbetrieb Forst Brandenburg | Landesbetrieb Forst Brandenburg | Forest conservation concept | State forestry departments | Regional | 2012 |
| Overall concept of forest nature conservation | Landesbetrieb ForstBW | Forest conservation concept | State forestry departments | Regional | 2015 |
| Conservation Guideline | Landesbetrieb HessenForst | Forest conservation concept | State forestry departments | Regional | 2011 |
| 49 Foresters- 49 Species | Landesforstbetrieb Sachsen-Anhalt | Forest conservation concept | State forestry departments | Regional | 2010 |
| Regional biodiversity strategy and Beech forest program | SaarForst Landesbetrieb | Forest conservation concept | State forestry departments | Regional | 2008 |
| Schmerber Manifesto - Protection of Biodiversity through Integrative Forest Management | FAUN -Initiative Forest Conservation Integrative | Forest handling concept | Associations and NGO´s | National | 2014 |
| Waldvision 2030: Objectives and principles of the ecological forest management Brandenburg | Ministry of Infrastructure and Agriculture of the State of Brandenburg | Forest handling concept | Institutions/ administrations | Regional | 2011 |
| Overall concept for ecological forest management of the state forest in North Rhine-Westphalia | Ministry of Environment, Spatial Planning and Agriculture North Rhine-Westphalia | Forest handling concept | Institutions/ administrations | Regional | 2000 |
| Forest Strategy 2050 for the Free State of Saxony | Saxon State Ministry of Environment and Agriculture | Forest handling concept | Institutions/ administrations | Regional | 2013 |
| Guideline for the management of the state forest and guideline for the Promotion and Conservation of Biodiversity in the State Forest of Saarland | SaarForst Landesbetrieb | Forest handling concept | State forestry departments | Regional | 2008 |
| Objective and principles of ecological forest management | Landesbetrieb Forst Brandenburg | Forest handling concept | State forestry departments | Regional | 2011 |
| Guide to the management of the state forest of Saxony-Anhalt under nature conservation aspects | Landesforstbetrieb Sachsen-Anhalt | Forest handling concept | State forestry departments | Regional | 2016 |
| Guideline for the Implementation of Goals and Principles of Natural Forestry Mecklenburg-Vorpommern | Landesforst Mecklenburg-Vorpommern | Forest handling concept | State forestry departments | Regional | 2002 |
| The LÖWE program of Lower Saxony | Niedersächsische Landesforsten | Forest handling concept | State forestry departments | Regional | 2011 |
| Program for the management of forests in Schleswig-Holstein on ecological aspects | Schleswig-Holsteinische Landesforsten | Forest handling concept | State forestry departments | Regional | 2007 |
| Near-natural forestry | Landesanstalt für Wald und Forstwirtschaft | Forest handling concept | State forestry departments | Regional | 2000 |
| Silviculture principles of the Bavarian State Forests | Bayerische Staatsforsten | Forest handling concept | State forestry departments | Regional | 2008 |
| Forest management guideline "Gruener Ordner" Brandenburg | Landesbetrieb Forst Brandenburg | Forest handling concept | State forestry departments | Regional | 2004 |
| Guideline for the management of the Hessian state forest | Hessian ministry for environment, energy, agriculture and consumer protection | Forest handling concept | State forestry departments | Regional | 2012 |
| Principles and guidelines for the natural economy in the Hessian state forest | Landesbetrieb HessenForst | Forest handling concept | State forestry departments | Regional | 2016 |
| Silviculture principles for the state forest of Saxony | Saxon State Ministry of Environment and Agriculture | Forest handling concept | State forestry departments | Regional | 1999 |
| Operating Instructions WALDBAU | Schleswig-Holsteinische Landesforsten | Forest handling concept | State forestry departments | Regional | 2011 |
| Silviculture principles for the state forests of Thuringia including the treatment guidelines of the main tree species | Thuringian Ministry of Agriculture, Nature Conservation and the Environment | Forest handling concept | State forestry departments | Regional | 2004 |
| Position papers Schutzgemeinschaft Deutscher Wald | Protection of German Forests Bavarian Association e.V. | Forest program | Associations and NGO´s | Regional | 2013 |
| German National Forest Strategy 2020 | Federal Ministry of Food, Agriculture and Consumer Protection | Forest program | Institutions/ administrations | National | 2011 |
| Thuringian Forestry Program 2000-2001 | Thuringian Ministry of Agriculture, Nature Conservation and the Environment | Forest program | Institutions/ administrations | Regional | 2001 |
| Guideline Forest 2014 in Saxony-Anhalt | Minister of Agriculture and Environment Saxony-Anhalt | Forest program | Institutions/ administrations | Regional | 2014 |
| Forest in transition - a chance for Thuringia | Ministry of Agriculture, Forestry, Environment and Nature Conservation Thuringia | Forest program | Institutions/ administrations | Regional | 2010 |
| Forest program Brandenburg | Ministry of Infrastructure and Agriculture of the State of Brandenburg | Forest program | Institutions/ administrations | Regional | 2011 |
| The Saxon forest - in the service of the general public | Staatsbetrieb Sachsenforst | Forest program | State forestry departments | Regional | 2008 |
| Forest Strategy 2020 in Saxony-Anahlt - Recommendations for politics and administration | Landesbeirat Holz Sachsen-Anhalt | Forest program | State forestry departments | Regional | 2011 |
| Precious forest through old and dead wood | NABU - Nature Conservation Association Germany e.V. National Association Saarland e.V. | Old and deadwood concept | Associations and NGO´s | Regional | 2014 |
| Habitat tree concept of Schleswig Holstein Landesforsten | Schleswig-Holsteinische Landesforsten | Old and deadwood concept | State forestry departments | Regional | 2010 |
| Concept for dealing with biotope trees, old trees and deadwood at Landesforsten Rheinland-Pfalz | Landesforsten Rheinland-Pfalz | Old and deadwood concept | State forestry departments | Regional | 2011 |
| Biotope wood strategy Xylobius North Rhine-Westphalia | Landesbetrieb Wald und Holz NRW | Old and deadwood concept | State forestry departments | Regional | 2014 |
| Operational instructions: Promotion of biotope trees and deadwood in the state forest of Brandenburg - Methusalem 2 | FORSTBrandenburg | Old and deadwood concept | State forestry departments | Regional | 2016 |
| Guideline for securing old and dead wood shares in the economic forest | Landesforst Mecklenburg-Vorpommern | Old and deadwood concept | State forestry departments | Regional | 2002 |
| Old- and deadwood concept | Landesbetrieb ForstBW | Old and deadwood concept | State forestry departments | Regional | 2010 |
